# Supplementary material for: Micro Salting-Out Assisted Matrix Solid-Phase Dispersion: A Simple and Fast Sample Preparation Method for the Analysis of Bisphenol Contaminants in Bee Pollen
Source: MDPI journal article supplement (doi:10.3390/molecules26082350), 2021-04-18
Supplement: s1 [file s1]

# Supplementary Materials

## Micro salting-out assisted matrix solid-phase dispersion: A simple and fast sample preparation method for the analysis of bisphenol contaminants in bee pollen

Jianing Zhang<sup>1</sup>, Fengjie Yu<sup>1</sup>, Yunmin Tao<sup>1</sup>, Chunping Du<sup>2,3</sup>, Wenchao Yang<sup>1,2,3</sup>, Wenbin Chen<sup>2,3,\*</sup> and Xijuan Tu<sup>2,3,\*</sup>

<sup>1</sup> College of Food Science, Fujian Agriculture and Forestry University, Fuzhou 350002, China.

<sup>2</sup> College of Bee Science, Fujian Agriculture and Forestry University, Fuzhou 350002, China.

<sup>3</sup> College of Animal Sciences, Fujian Agriculture and Forestry University, Fuzhou 350002, China.

\* Correspondence: wbchen@fafu.edu.cn (W.C.); xjtu@fafu.edu.cn (X.T.)

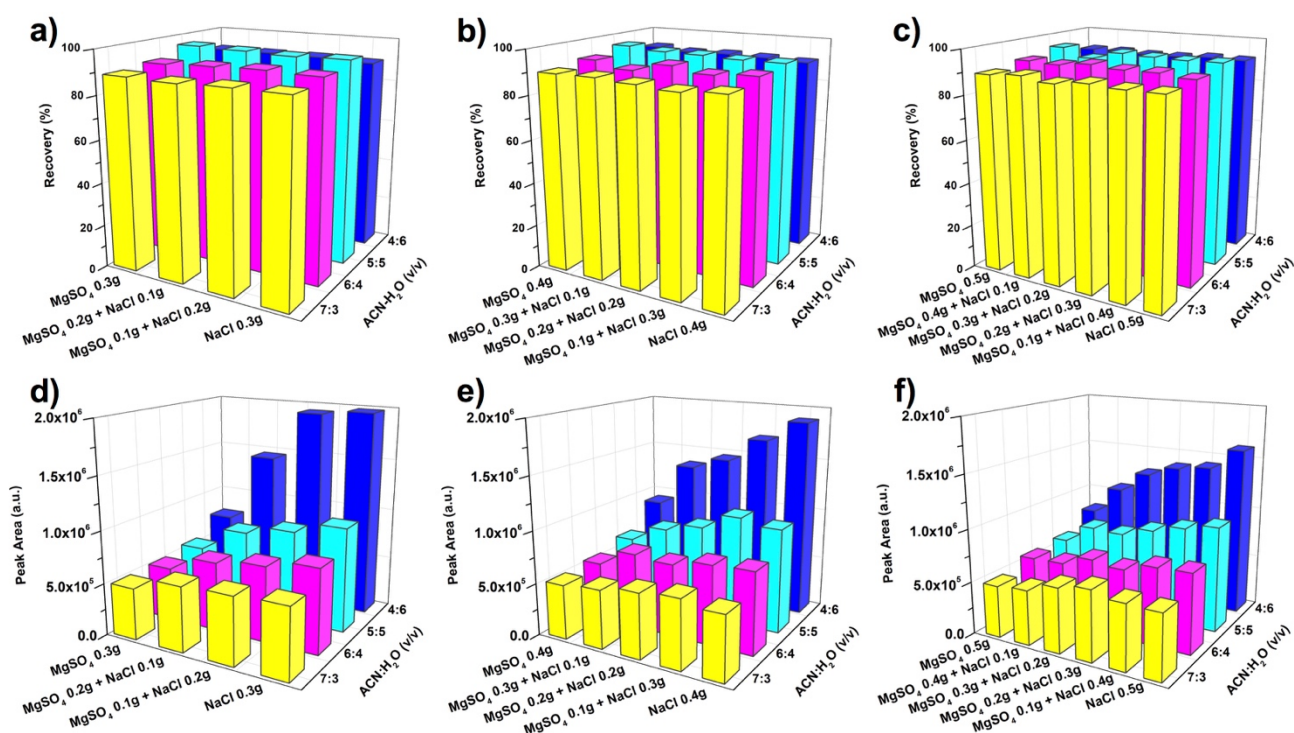

**Figure S1.** Effects of salts and ACN-H<sub>2</sub>O mixture on the calculated recovery (a, b, and c) and signal response (d, e, and f) of bisphenol B (BPB). The total mass of salts were 0.3 g (a and d), 0.4 g (b and e), and 0.5 g (c and f). Mean values of triplicate experiments were presented.

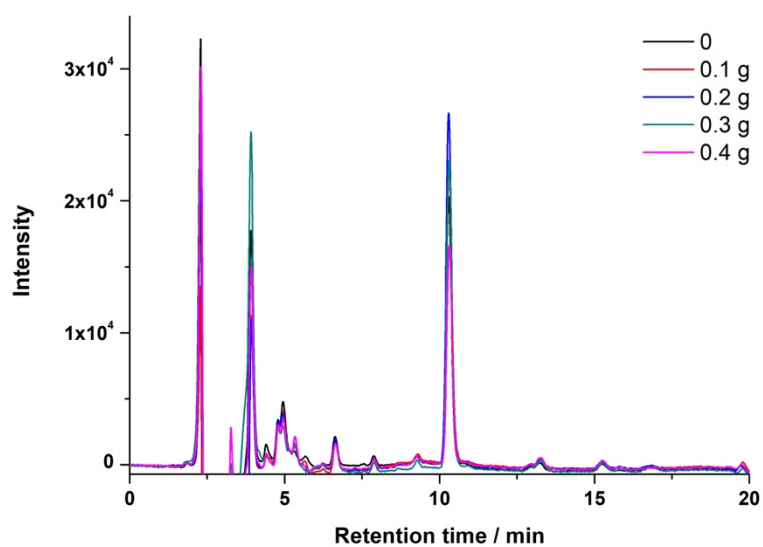

**Figure S2.** Representative HPLC-FLD chromatograms of extract under different masses of PSA. Separation was performed for the analysis of bisphenols; the excitation and emission wavelength of FLD were 270 nm and 305 nm, respectively.
